# Contribution of Interaction between Nitric Oxide and Cyclooxygenases to the Production of Prostaglandins in Carrageenan-induced Inflammation

Masaki Toriyabe, M.D.,\* Keiichi Omote, M.D.,† Tomoyuki Kawamata, M.D.,‡ Akiyoshi Namiki, M.D., Ph.D.§

**Background:** Nitric oxide (NO) and prostaglandins (PGs) are crucial mediators contributing to generation of inflammatory responses and pain. This study was designed to investigate the effects of peripherally released NO on cyclooxygenase (COX) expression/activation and production of PGs in carrageenan-induced inflammation.

**Methods:** A microdialysis probe was implanted subcutaneously into the skin of hind paws of rats. The concentrations of NO metabolites, PGE<sub>2</sub>, and 6-keto-PGF<sub>1α</sub> (metabolite of PGI<sub>2</sub>) in the dialysate were measured. Carrageenan was injected into the plantar surface of the hind paw during perfusion of the dialysis catheter with modified Ringer's solution or N<sup>G</sup>-monomethyl-L-arginine acetate. In addition, the effects of the selective COX-1 inhibitor SC-560 and the selective COX-2 inhibitor NS-398 on the production of NO, PGE<sub>2</sub>, and 6-keto-PGF<sub>1α</sub> were examined. Western blotting was performed to evaluate the expression of COX-1 and COX-2 in the skin at the site of the inflammation.

**Results:** Carrageenan injection resulted in increases in the concentrations of NO, PGE<sub>2</sub>, and PGI<sub>2</sub>, and these increases were completely suppressed by N<sup>G</sup>-monomethyl-L-arginine acetate. SC-560 effectively inhibited the increase in PGE<sub>2</sub> and PGI<sub>2</sub> concentrations for the first 2 h, and NS-398 inhibited 3–6 h after carrageenan. Western blot analysis showed that the concentrations of both COX-1 and COX-2 in the skin increased after carrageenan. The up-regulation of COX-1 in the skin was observed 3 and 6 h after carrageenan and was not suppressed in the rats treated with N<sup>G</sup>-monomethyl-L-arginine acetate. The up-regulation of COX-2 in the skin was also observed 3 and 6 h after carrageenan and was completely suppressed in the rats treated with N<sup>G</sup>-monomethyl-L-arginine acetate.

**Conclusion:** The results of the current study suggest that NO activates COX-1 in the early phase of carrageenan and up-regulates COX-2 expression in the late phase in the skin, resulting in production of PGE<sub>2</sub> and PGI<sub>2</sub> at the site of inflammation, which would contribute to exacerbation of the inflammatory process.

TISSUE injury and inflammation result in swelling and hyperalgesic pain, phenomena that are thought to be due, in great part, to sensitization of primary afferent nociceptors. Inflammatory mediators have been implicated in induction of the sensitization and hyperalgesia. A number of observations suggest that peripheral nitric oxide (NO) acts as a pronociceptive mediator in inflam-

mation<sup>1-3</sup> in experimental models such as adjuvant arthritis<sup>4</sup> and carrageenan-induced inflammation in the rat.<sup>3,5,6</sup> Prostaglandins (PGs) are also well established as inflammatory mediators that act directly on peripheral terminals of primary afferent nociceptors<sup>7</sup> to sensitize nociceptors *in vitro*<sup>8</sup> and on spinal dorsal horn neurons<sup>9</sup> to produce hyperalgesia. Hyperalgesic effects of PGE<sub>2</sub> and PGI<sub>2</sub> and occasionally PGF<sub>2α</sub> have been reported in inflammatory models.<sup>10</sup> Cyclooxygenase (COX) enzymes catalyze the bis-oxygenation of free arachidonic acid to PGH<sub>2</sub>, the committed step in PG formation. It is well known that there are two isoforms of COX enzymes, referred to as COX-1 and COX-2. COX-1 is thought to produce PGs that are important for homeostasis and certain physiologic functions and is expressed constitutively in most tissues and cells.<sup>11</sup> In an inflammatory process, the inducible isoform of COX, COX-2, is encoded by an immediate-early gene induced by cytokines, mitogens, and endotoxins in inflammatory cells, accounting for the release of large quantities of PG at the site of inflammation.<sup>11,12</sup>

Several studies have suggested an interaction of NO and PG in which the production of PGE<sub>2</sub> is augmented further in the presence of NO. Inhibition of NO production by nitric oxide synthase (NOS) inhibitors has been found to decrease the production of PGE<sub>2</sub> in *in vitro* and *ex vivo* models.<sup>5,13</sup> It is thought that this effect of NO is due to its ability to activate the COX enzyme by an as-yet-undetermined mechanism.<sup>6</sup> In inflammation, the functional relation between the NO and COX pathways suggests that NO exacerbates the inflammatory process through the generation of additional PG production.<sup>14</sup> However, it has been reported that NO is involved in the negative regulation of the COX pathway.<sup>15,16</sup> Therefore, the relation between NO and PG pathways at the sites of peripheral inflammation is still controversial, and *in vivo* data are scarce.<sup>17</sup> Even assuming there is a relation between these pathways, the mechanisms of this interaction remain to be clarified. The current study was undertaken to determine whether NO released in carrageenan-induced inflammation would activate or up-regulate the expression of COX-1 and COX-2 in the dorsal root ganglia (DRG) and in the skin at the site of inflammation, resulting in additional production of PGE<sub>2</sub> and PGI<sub>2</sub>. In addition, the effects of inhibition of COX-1 and COX-2 actions on the production of NO were examined.

\* Postgraduate Student, † Associate Professor, ‡ Instructor, § Professor and Chairman.

Received from the Department of Anesthesiology, Sapporo Medical University School of Medicine, Sapporo, Japan. Submitted for publication January 26, 2004. Accepted for publication June 21, 2004. Support was provided solely from institutional and/or departmental sources.

Address reprint requests to Dr. Omote: Department of Anesthesiology, Sapporo Medical University School of Medicine, South-1, West-16, Chuo-ku, Sapporo, Hokkaido 060-8543, Japan. Address electronic mail to: komote@sapmed.ac.jp. Individual article reprints may be purchased through the Journal Web site, www.anesthesiology.org.

## Materials and Methods

The protocol of this study was approved by the Sapporo Medical University Animal Care and Use Committee. The animals used in this study were male Sprague-Dawley rats (weight, 200–250 g; Japan SLC, Hamamatsu, Japan), which were housed individually in a temperature-controlled ( $21 \pm 1^\circ\text{C}$ ) room with a 12 h light–dark cycle and were given free access to food and water. Each animal was used in only one experiment.

### Construction of Microdialysis Probe and Animal Preparation

A microdialysis probe was constructed from a 2-cm length of dialysis fiber (ID of 200  $\mu\text{m}$ , OD of 220  $\mu\text{m}$ , and 50-kD molecular weight cutoff; DM-22; Eicom, Kyoto, Japan) that was coated with a thin layer of epoxy glue (Devcon, Danvers, MA) along the whole length, except for a 15-mm region in the middle. Each end of the fiber was attached to 10-cm polyethylene catheters (PE-10; Becton-Dickinson, Franklin Lakes, NJ), and each end of the polyethylene catheter was attached to a 50-cm Teflon tube (ID of 100  $\mu\text{m}$ , OD of 400  $\mu\text{m}$ ; JT-10; Eicom).

The rats were anesthetized with sodium pentobarbital (50 mg/kg intraperitoneally), and additional sodium pentobarbital was administered throughout the experiment to maintain areflexia. A microdialysis probe was subcutaneously inserted into the left glabrous skin of the hind paw, as described previously.<sup>2,3,18</sup> The probe was perfused with modified Ringer's solution (140 mM NaCl, 4.0 mM KCl, 1.26 mM  $\text{CaCl}_2$ , 1.15 mM  $\text{MgCl}_2$ , 2.0 mM  $\text{Na}_2\text{HPO}_4$ , 0.5 mM  $\text{NaH}_2\text{PO}_4$ , and pH 7.4) at a constant flow rate of 4  $\mu\text{L}/\text{min}$  for 120 min to establish a diffusion equilibrium. In another series, during general anesthesia (isoflurane in oxygen), the left sciatic nerve and L3 spinal root were exposed and transected. Seven days after neurectomy, a microdialysis probe was subcutaneously inserted.

### Microdialysis Study

The microdialysis probe was perfused with modified Ringer's solution (control group) or 40 mM of nonselective NOS inhibitor, *N*<sup>G</sup>-monomethyl-L-arginine acetate (L-NMMA; Dojindo Laboratories, Kumamoto, Japan) (L-NMMA group) at a constant flow rate of 4  $\mu\text{L}/\text{min}$ . In the animals with denervation of the sciatic nerve and spinal root, modified Ringer's solution was perfused (denervation group). Sixty minutes after the perfusion, the sample was collected to obtain the basal concentration, and 2 mg carrageenan in a volume of 50  $\mu\text{L}$  was injected into the plantar surface of the left hind paw with a 29-gauge needle. Dialysate collection was started with a 4-min delay because of the dead space of the outflow catheter to sample subcutaneous dialysate from the time of carrageenan injection. The samples were collected as 60-min fractions. Collected samples were immediately ana-

lyzed for NO or frozen at  $-80^\circ\text{C}$  until used for analysis of  $\text{PGE}_2$  and  $\text{PGI}_2$ . In another series of experiments, the selective COX-1 inhibitor SC-560 (10 mg/kg) or the selective COX-2 inhibitor NS-398 (10 mg/kg) was administered intraperitoneally 60 min before the injection of carrageenan to examine the effects of these inhibitors on the releases of NO,  $\text{PGE}_2$ , and  $\text{PGI}_2$ .

In four rats that had received a cannulation of right internal carotid artery, rectal temperature, respiratory rate, arterial partial pressure of oxygen, arterial partial pressure of carbon dioxide, and systemic arterial blood pressure were monitored during sodium pentobarbital anesthesia to confirm the stable preparation for the microdialysis study. The values of these parameters were stable for 8 h (data not shown).

### Analysis of $\text{NO}_2^-$ – $\text{NO}_3^-$

The concentrations of NO metabolites (total amount of nitrite [ $\text{NO}_2^-$ ] and nitrate [ $\text{NO}_3^-$ ],  $\text{NO}_2^-$ – $\text{NO}_3^-$ ) in the dialysate were analyzed using an automated NO-detecting high-performance liquid chromatography system (ENO-10; Eicom) as described previously.<sup>19</sup>  $\text{NO}_2^-$  and  $\text{NO}_3^-$  in the dialysate were separated by a reverse-phase separation column packed with polystyrene polymer ( $4.6 \times 50$  mm; NO-PAK; Eicom), and  $\text{NO}_3^-$  was reduced to  $\text{NO}_2^-$  in a reduction column packed with copper-plated cadmium filling (NO-RED; Eicom).  $\text{NO}_2^-$  was mixed with a Griess reagent to form a purple azo dye in a reaction coil. The separation and reduction columns and the reaction coil were placed in a column oven that was set at  $35^\circ\text{C}$ . The absorbance of the color of the product dye at 540 nm was measured using a flow-through spectrophotometer (NOD-10; Eicom). The mobile phase, which was delivered by a pump at a rate of 0.33 ml/min, was 10% methanol containing 0.15 M NaCl– $\text{NH}_4\text{Cl}$  and 0.5 g/l 4Na-EDTA. The Griess reagent, which was 1.25% HCl that contained 5 g/l sulfanilamide with 0.25 g/l *N*-naphthyl ethylenediamine, was delivered at a rate of 0.1 ml/min. Contamination of  $\text{NO}_2^-$ – $\text{NO}_3^-$  in modified Ringer's solution and reliability of the reduction column were evaluated in each experiment.

### Analysis of $\text{PGE}_2$ and $\text{PGI}_2$

The concentrations of  $\text{PGE}_2$  and 6-keto- $\text{PGF}_{1\alpha}$  (metabolite of  $\text{PGI}_2$ ) in the dialysate were measured by using commercially available enzyme immunoassay kits (Cayman Chemicals, Ann Arbor, MI). Measurement was completed by using an enzyme-linked immunosorbent assay with an absorbency maximum at 405 nm.

### Western Blotting

During pentobarbital anesthesia (50 mg/kg administered intraperitoneally), the glabrous skin of the left hind paw and the left four to six lumbar DRG were rapidly removed from the rats in which modified Ringer's solution or L-NMMA was perfused through the microdialysis

probe and from the rats with denervation to analyze the expression of COX-1 and COX-2.

The removed tissue was homogenized in 0.01 M phosphate-buffered saline (PBS; pH 7.4). The crude homogenates were centrifuged at 15,000g for 20 min at 4°C, and protein content was determined using DC protein assay (Bio-Rad Laboratories Inc., Hercules, CA) with bovine serum albumin. The proteins were then put in a 4× sample buffer consisting of 0.2 M Tris-HCl (pH 6.8), 4% sodium dodecylsulfate, 8 M urea, 0.1 M dithiothreitol, and 0.01% bromophenol blue. Equal amounts of protein per lane were loaded onto a 7.5% polyacrylamide gel and separated by electrophoresis at 10 mA/gel for 60 min and then at 20 mA/gel for 60 min with a running buffer containing 25 mM Tris, 192 mM glycine, and 0.1% sodium dodecylsulfate. Molecular weight markers (Amersham Biosciences, Buckinghamshire, United Kingdom) were used in each gel. Electrophoresis standards of COX-1 (Cayman Chemicals) and COX-2 (Cayman Chemicals) were also used. Proteins were transferred to a polyvinylidene difluoride membrane (Immobilon-P; Millipore Corporation, Bedford, MA) at 36 V for 4 h using a transfer buffer containing 0.01 M 3-[cyclohexylamino]-1-propanesulfonic acid (pH 11)–10% methanol. The blots were incubated with 5% nonfat dry milk in PBS for 1 h at room temperature to block nonspecific binding of the antibodies. Then membrane was incubated with a mouse monoclonal anti-COX-1 antibody (1:1,000; Cayman Chemicals) or a rabbit polyclonal anti-COX-2 antibody (1:500; Cayman Chemicals) in 0.1% bovine serum albumin in PBS overnight at 4°C. The concentrations of actin, a housekeeping protein, were also measured using rabbit anti-actin antibody (1:1,000; Sigma Chemical Co., St. Louis, MO). The blot was washed for 30 min with two changes of 2% nonfat dry milk–0.1% Tween-20 in PBS and then incubated with a goat anti-rabbit immunoglobulin G or a goat anti-mouse immunoglobulin G secondary antibody conjugated to horseradish peroxidase (1:5,000; DAKO, Glostrup, Denmark) in 0.1% bovine serum albumin in PBS for 30 min at room temperature. The membrane was washed five times for 30 min with 2% nonfat dry milk–0.1% Tween-20 in PBS. The reaction product was visualized on x-ray film (XAR-5; Kodak, Rochester, NY) using an enhanced chemiluminescence kit (Amersham Biosciences). The amount of expressed protein was quantified and analyzed using image densitometer (NIH Image 1.63; National Institutes of Health, Bethesda, MD).

To show specificity of antibodies of COX-1 and COX-2 used in this study, Western blots were also performed on purified COX-1 and COX-2 electrophoresis proteins (Cayman Chemicals). In addition, specific antigen peptides against COX-1 and COX-2 (Cayman Chemicals) were added to primary antibody solution for preabsorption study.

### Immunohistochemistry

The normal and inflamed rats were deeply anesthetized with pentobarbital and transcardially perfused with 100 ml saline followed by 300 ml paraformaldehyde (4% in 0.1 M phosphate buffer). The glabrous skins of the hind paw were dissected, postfixed in 4% paraformaldehyde, and transferred to 25% sucrose (overnight at degree). Frozen sections (30 μm) of the skins were thaw-mounted onto gelatin-coated slide glass. All of the sections were blocked with 10% normal goat serum in 0.2% Triton X-100 for 30 min at room temperature and incubated for 48 h at 4°C with primary antibodies. The sections were then incubated for 2 h at room temperature with fluorescent secondary antibodies (Alexa Fluor 488 or 594; Molecular Probes, Eugene, OR). Photographs were taken by a confocal laser scanning microscope. All analyses were performed at 20× objective magnification.

### Statistical Analysis

The concentrations of  $\text{NO}_2^-$ – $\text{NO}_3^-$ ,  $\text{PGE}_2$ , and  $\text{PGI}_2$  were expressed as mean ± SD of percentage of the basal value. Proteins were quantified using a densitometer to give COX-1:actin and COX-2:actin ratios. Relative expressions of the proteins were presented as mean ± SD. The statistical significance of the data was analyzed by a two-way analysis of variance followed by the Fisher protected least significant difference test. A *P* value less than 0.05 was considered to be statistically significant.

## Results

### Effects of L-NMMA and Denervation on $\text{NO}_2^-$ – $\text{NO}_3^-$ Concentration after Carrageenan Injection

A preliminary study showed that a dialysis equilibrium was obtained within 120 min after the start of modified Ringer's solution perfusion at a constant flow rate of 4 μl/min and that basal values were stable for at least 8 h (data not shown). The basal concentrations of  $\text{NO}_2^-$ – $\text{NO}_3^-$  in the control and L-NMMA-treated rats and in the rats with denervation were shown in table 1. The basal concentrations among the three groups were comparable. The concentrations of  $\text{NO}_2^-$ – $\text{NO}_3^-$  before and after L-NMMA were also comparable.

Subcutaneous injection of carrageenan significantly (*P* < 0.05) increased the  $\text{NO}_2^-$ – $\text{NO}_3^-$  concentrations in the dialysate under the condition of perfusion with modified Ringer's solution (fig. 1). The increases were observed for more than 6 h. The perfusion of L-NMMA through the microdialysis probe significantly (*P* < 0.05), and almost completely, suppressed the carrageenan-induced increase in  $\text{NO}_2^-$ – $\text{NO}_3^-$  concentration (fig. 1, left). In the animals with denervated sensory nerves in the hind paw, the increase in the concentration of  $\text{NO}_2^-$ – $\text{NO}_3^-$  after carrageenan was completely suppressed until 2 h after carrageenan injection and was significantly (*P* < 0.05) lower than that of the control



**Table 1. Baseline Values of  $\text{NO}_2^-$ - $\text{NO}_3^-$ ,  $\text{PGE}_2$ , and 6-Keto-PGF $_{1\alpha}$** 

|                                                           | Control        | L-NMMA         |                | Denervated     |
|-----------------------------------------------------------|----------------|----------------|----------------|----------------|
|                                                           |                | Before         | After          |                |
| $\text{NO}_2^-$ - $\text{NO}_3^-$ , pmol/10 $\mu\text{l}$ | 24.4 $\pm$ 8.0 | 22.0 $\pm$ 6.5 | 24.1 $\pm$ 6.2 | 20.0 $\pm$ 4.5 |
| $\text{PGE}_2$ , pg/ml                                    | 23.0 $\pm$ 7.6 | 28.9 $\pm$ 6.1 | 29.3 $\pm$ 8.3 | 32.4 $\pm$ 9.9 |
| 6-Keto-PGF $_{1\alpha}$ , pg/ml                           | 14.9 $\pm$ 6.9 | 12.0 $\pm$ 4.2 | 11.1 $\pm$ 4.4 | 19.0 $\pm$ 7.0 |

Data are presented as mean  $\pm$  SD.

L-NMMA =  $N^G$ -monomethyl-L-arginine acetate;  $\text{NO}_2^-$  = nitrite;  $\text{NO}_3^-$  = nitrate; PG = prostaglandin.

group during the study period but significantly ( $P < 0.05$ ) higher than that of the L-NMMA group 3 h after carrageenan injection and thereafter.

#### *Effects of L-NMMA and Denervation on $\text{PGE}_2$ and 6-Keto-PGF $_{1\alpha}$ Concentrations after Carrageenan Injection*

A dialysis equilibrium of  $\text{PGE}_2$  and 6-keto-PGF $_{1\alpha}$  was obtained within 60 min after the start of modified Ringer's solution perfusion, and basal values were stable for more than 8 h (data not shown). The basal values of  $\text{PGE}_2$  and 6-keto-PGF $_{1\alpha}$  concentrations in control and L-NMMA-treated rats and in the rats with denervation are shown in table 1. The concentrations among the three groups were comparable.

Prostaglandin  $\text{E}_2$  and 6-keto-PGF $_{1\alpha}$  concentrations in the dialysate significantly ( $P < 0.05$ ) increased after carrageenan injection under the condition of perfusion with modified Ringer's solution (control group), as shown in figure 2. These increased concentrations were observed for up to 6 h in this study. The perfusion with L-NMMA through the microdialysis probe significantly ( $P < 0.05$ ) suppressed the carrageenan-induced increase in the concentrations of  $\text{PGE}_2$  and 6-keto-PGF $_{1\alpha}$ . In the rats with denervation, the concentrations of  $\text{PGE}_2$  and 6-keto-PGF $_{1\alpha}$  after carrageenan injection were significantly ( $P < 0.05$ ) lower than those of the control group but significantly ( $P < 0.05$ ) higher than those of the L-NMMA group.

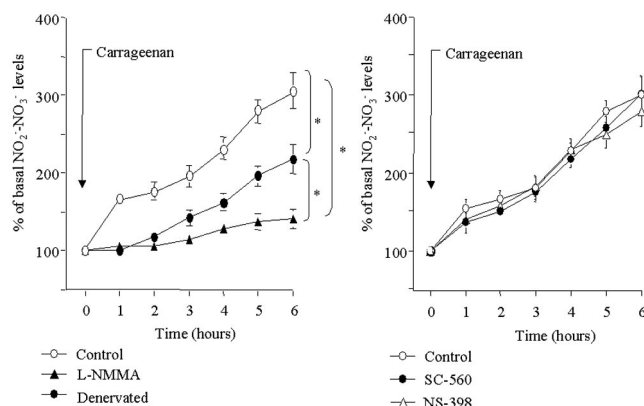

**Fig. 1. (Left)** Time courses of the subcutaneous concentration of nitrite ( $\text{NO}_2^-$ )-nitrate ( $\text{NO}_3^-$ ) after injection of carrageenan. **(Right)** Effects of SC-560 and NS-398 on subcutaneous concentrations of  $\text{NO}_2^-$ - $\text{NO}_3^-$ . Data are presented as mean  $\pm$  SD from six rats in each group. \*  $P < 0.05$ . L-NMMA =  $N^G$ -monomethyl-L-arginine acetate.

#### *Effects of SC-560 and NS-398 on $\text{NO}_2^-$ - $\text{NO}_3^-$ , $\text{PGE}_2$ , and 6-Keto-PGF $_{1\alpha}$ Concentrations after Carrageenan Injection*

The concentrations of  $\text{NO}_2^-$ - $\text{NO}_3^-$  after carrageenan in the animals that had received pretreatment with the selective COX-1 inhibitor SC-560 were comparable with those in control animals (fig. 1, right). Selective COX-2 inhibitor NS-398 also did not show any effects on the increased concentrations of  $\text{NO}_2^-$ - $\text{NO}_3^-$  seen in control animals.

Figure 3 shows the effects of SC-560 and NS-398 on the concentrations of  $\text{PGE}_2$  and 6-keto-PGF $_{1\alpha}$  after carrageenan injection. Pretreatment with SC-560 significantly ( $P < 0.05$ ) suppressed the increases in  $\text{PGE}_2$  and 6-keto-PGF $_{1\alpha}$  concentrations for the first 2 h after carrageenan but not at 3 h and thereafter. In contrast, NS-398 significantly ( $P < 0.05$ ) suppressed the increasing in  $\text{PGE}_2$  and 6-keto-PGF $_{1\alpha}$  concentrations 3 h after carrageenan and thereafter but not for the first 2 h.

#### *Expressions of COX-1 and COX-2*

Figure 4A shows the specificity of COX-1 and COX-2 antibodies to purified COX-1 and COX-2 proteins, respectively. Preabsorption of the COX-1 and COX-2 antibodies abolished the immunoreactivity of COX-1 and COX-2 isoforms, respectively (fig. 4B).

Figure 5 shows the expressions of COX-1 and COX-2 in the DRG. In normal condition, the DRG expressed detectable concentrations of COX-1 and COX-2. Injection

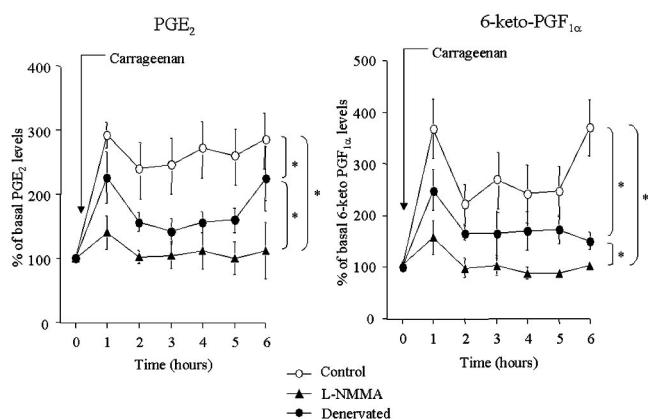

**Fig. 2. Time courses of the subcutaneous concentration of prostaglandin (PG)  $\text{E}_2$  (left) and 6-keto-PGF $_{1\alpha}$  (right) after injection of carrageenan. Data are presented as mean  $\pm$  SD from six rats in each group. \*  $P < 0.05$ . L-NMMA =  $N^G$ -monomethyl-L-arginine acetate.**

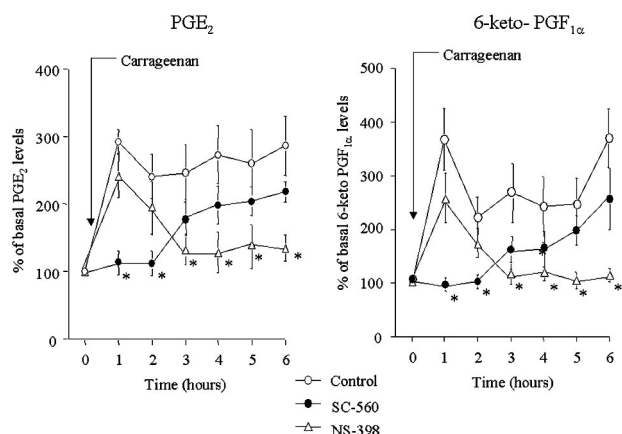

**Fig. 3.** Effects of SC-560 and NS-398 on subcutaneous concentrations of prostaglandin (PG) E<sub>2</sub> (left) and 6-keto-PGF<sub>1α</sub> (right). Data are presented as mean  $\pm$  SD from six rats in each group. \*  $P < 0.05$  versus control.

of carrageenan did not affect the basal expression of either COX-1 or COX-2 at each time point (3 and 6 h after carrageenan injection).

Figure 6 shows the expressions of COX-1 and COX-2 in the skin of the hind paw. The expression level of COX-1 protein after injection of carrageenan showed significant ( $P < 0.05$ ) increases at 3 and 6 h, but not 1 h, after carrageenan injection (figs. 6A, left, and 6B, left). The expression levels of COX-1 after carrageenan under the condition of perfusion of L-NMMA were comparable with those under the condition of modified Ringer's solution perfusion (fig. 6B, left). In the animals with denervation, the carrageenan-induced increase in the COX-1 protein expression level was significantly ( $P < 0.05$ ) suppressed.

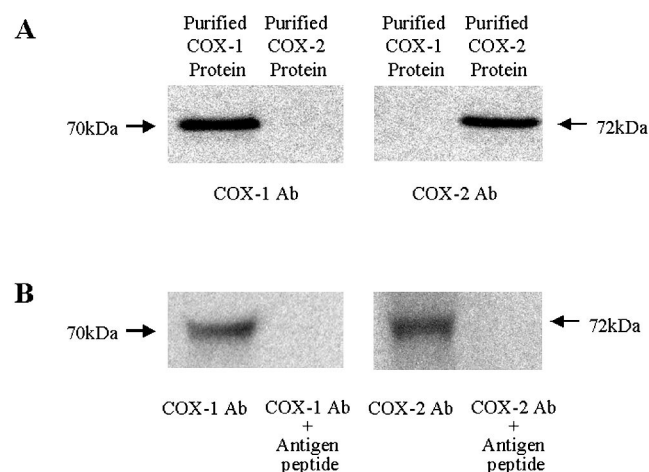

**Fig. 4.** (A) Western blots for cyclooxygenase (COX)-1 (left) and COX-2 (right) using 100 ng purified COX-1 protein and 30 ng purified COX-2 protein. (B) Western blots for COX-1 (left) and COX-2 (right) proteins extracted from skin of the rat that was injected with carrageenan 6 h before with use of COX-1 and COX-2 antibodies and the preabsorbed antibodies with each specific antigen peptide. Ab = antibody.

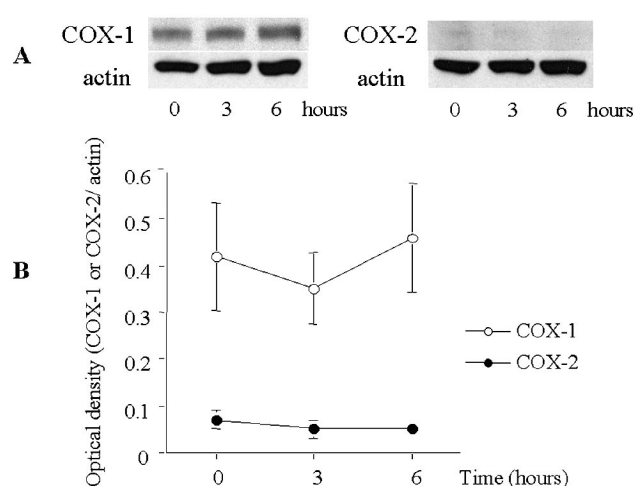

**Fig. 5.** Cyclooxygenase (COX)-1 and COX-2 expressions in dorsal root ganglia. (A) Western blots for COX-1 (left) and COX-2 (right) protein extracted from dorsal root ganglia after the injection of carrageenan. COX-1, COX-2, and actin were immunodetected as shown in representative blots. (B) Optical density analyses of COX-1:actin and COX-2:actin ratios. Data are presented as mean  $\pm$  SD from six rats at each time point.

The expression level of COX-2 protein in the skin increased significantly ( $P < 0.05$ ) at 3 and 6 h, but not 1 h, after carrageenan injection (figs. 6A, right, and 6B, right). L-NMMA completely suppressed the carrageenan-induced increase in the expression level of COX-2 (fig. 6B, right). COX-2 expression levels in the animals with denervation also increased after carrageenan, but the magnitude of increase was significantly ( $P < 0.05$ ) lower than that in the control group. There was a significant ( $P < 0.05$ ) difference of COX-2 concentrations among the three groups.

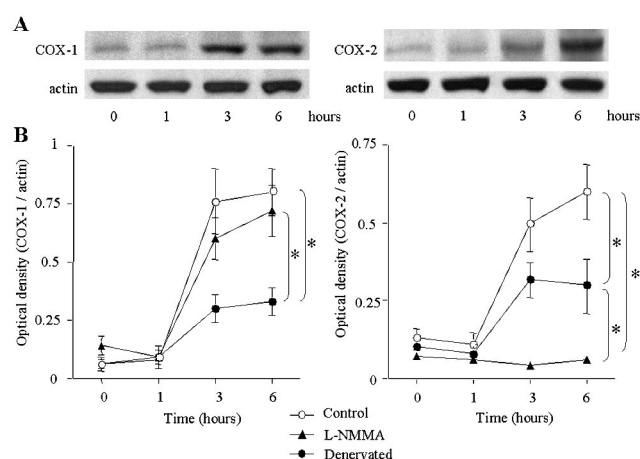

**Fig. 6.** Cyclooxygenase (COX)-1 and COX-2 expressions in skin and the effects of N<sup>G</sup>-monomethyl-L-arginine acetate (L-NMMA) and denervation. (A) Western blots for COX-1 (left) and COX-2 (right) proteins extracted from skin after the injection of carrageenan. COX-1, COX-2, and actin were immunodetected as shown in representative blots. (B) Optical density analyses of COX-1:actin (left) and COX-2:actin (right) ratios. Data are presented as mean  $\pm$  SD from six rats at each time point. \*  $P < 0.05$ .

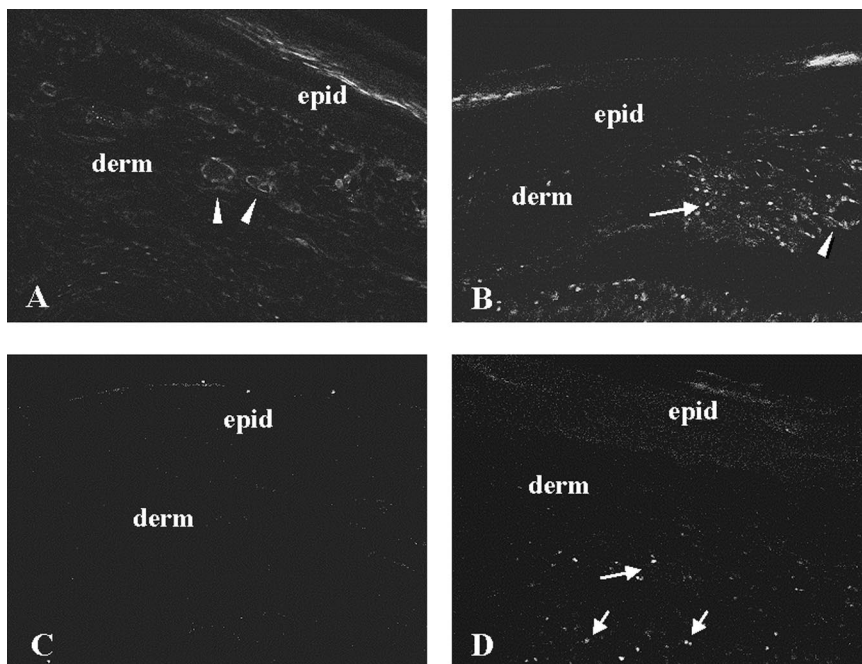

Fig. 7. Photographs of immunofluorescent staining of cyclooxygenase (COX)-1 (A and B) and COX-2 (C and D). (A and C) COX-1 and COX-2 immunoreactivity in the normal glabrous skin of the rat hind paw, respectively. (B and D) COX-1 and COX-2 immunoreactivity in the inflamed glabrous skin of the hind paw. Arrow = COX-1 or COX-2 immunoreactive cells; arrowhead = blood vessel; derm = dermis; epid = epidermis.

Cyclooxygenase-1 and COX-2 immunoreactivities in the glabrous skin of the rat hind paw are shown in figure 7. The COX-1 immunoreactivity was observed in the blood vessels in the normal skin. Six hours after carrageenan injection, many COX-1 immunoreactive cells were observed in the dermis and in the blood vessels. The COX-2 immunoreactivity was very limited in normal glabrous skin. However, 6 h after carrageenan injection, COX-2 immunoreactive cells were markedly increased in the dermis.

## Discussion

The current study demonstrated that carrageenan-induced inflammation increased peripheral concentrations of NO, PGE<sub>2</sub>, and PGI<sub>2</sub>, and the increases were completely inhibited by NOS inhibitor L-NMMA. In the animals that had undergone neurectomy, the increases in NO and PGs after carrageenan were partially inhibited. The COX-1 inhibitor suppressed the increases in the concentrations of PGs for the first 2 h, and the COX-2 inhibitor suppressed the increasing 3 h after carrageenan and thereafter. Neither the COX-1 nor the COX-2 inhibitor suppressed the increasing in NO concentrations after carrageenan. It was also found that injection of carrageenan increased the COX-1 and COX-2 expression levels in the skin of the hind paw but not in the lumbar DRG. L-NMMA inhibited the up-regulation of COX-2 but not that of COX-1. The carrageenan-induced up-regulation of COX-1 and COX-2 expressions in the skin was partially inhibited in the animals with denervated sensory nerves.

### Peripheral NO, PGE<sub>2</sub>, and PGI<sub>2</sub> in Inflammation

We previously reported that carrageenan-induced production of NO was mediated by neuronal NOS (nNOS) in

the early phase (~3 h) and by both nNOS and inducible NOS (iNOS) in the late phase (~3.5 hours) of carrageenan-induced inflammation.<sup>3</sup> This finding is consistent with the results of the current study, in which carrageenan-induced inflammation increased peripheral concentrations of NO, which were completely inhibited by L-NMMA, and in which increases in NO concentrations in the animals that had undergone neurectomy were completely inhibited until 2 h after carrageenan and partially inhibited thereafter. The nNOS is primarily found within the nervous system, and iNOS is present in various cell types, including macrophages, chondrocytes, and neutrophils, and is also found in central nervous system glial cells.<sup>20</sup> Therefore, it seems that nNOS in peripheral nerves and iNOS in inflammation-related cells contribute to the production of peripherally released NO in inflammation.

Hyperalgesic effects of PGs have been reported in several inflammatory models of nociception. Although PGE<sub>2</sub> has attained wide recognition as a mediator of hyperalgesia,<sup>7,8</sup> PGI<sub>2</sub> has also been shown to produce hyperalgesia as potently as PGE<sub>2</sub>.<sup>21</sup> When the effects of PGE<sub>2</sub> and PGI<sub>2</sub> on sensory neurons are compared directly, PGI<sub>2</sub> is equally effective or even more effective as a hyperalgesic or sensitizing agent both *in vivo*<sup>22,23</sup> and *in vitro*.<sup>24,25</sup> This study has shown that not only PGE<sub>2</sub> but also PGI<sub>2</sub> concentrations increased in carrageenan-induced inflammation, and these increases should contribute to the induction and maintenance of inflammatory responses and pain.

### NO-induced Prostaglandin Production

We demonstrated in this study that the inhibition of NO production by NOS inhibitor perfusion was associ-



ated with complete inhibition of not only NO but also PGE<sub>2</sub> and PGI<sub>2</sub> release; therefore, it is possible that the antiinflammatory and antihyperalgesic potencies of the NOS inhibitors are correlated with their ability to block both NO and PG releases. This is consistent with the previously reported results showing that an inhibition of edema with nonselective NOS inhibitor was associated with inhibition of NO release and clear inhibition of PGE<sub>2</sub> release in carrageenan-induced inflammation.<sup>6</sup> These indicate that PG production is in part mediated by NO. Because NO release is mediated by nNOS in the early phase and by both nNOS and iNOS in the late phase, it seems that NO derived from not only iNOS but also nNOS contributes to the enhancement of production of PGs in inflammation.

Several *in vitro* studies have suggested that NO activates COX activity, but the molecular mechanism by which NO activates COX remains to be identified, and moreover, *in vivo* data are scarce.<sup>17</sup> Some possible mechanisms have been proposed: antioxidant effect of NO by removal of O<sub>2</sub><sup>-</sup>, which is involved in the autoinactivation of the COX enzyme<sup>26,27</sup>; NO-induced formation of nitrosothiols from COX enzyme, leading to changes in the structure of the COX<sup>28</sup>; and NO-induced generation of oxidant peroxynitrite, which acts as an activator of COX activity.<sup>29</sup> Also, the study of Posadas *et al.*<sup>30</sup> showed that administration of an iNOS inhibitor reduced COX-2 activity and the content of PGE<sub>2</sub> in exudates and did not affect the expression of COX-2 in a model of experimental inflammation in mice that were injected with zymosan. These suggest that NO enhances COX activity in inflammation without affecting the expression of COX. In the current study, however, we found the up-regulation of COX expression in the late phase in the skin at the site of inflammation. The fact that L-NMMA perfusion suppressed the expression of COX-2 but not that of COX-1 suggests the up-regulation of COX-2 expression by peripheral NO. In addition, in the animals that had been denervated, the up-regulation of the COX-2 expression in the skin was partially suppressed. These findings indicate that NO produced by nNOS in peripheral nerves partially contributes to this up-regulation. A large variety of agents such as proinflammatory cytokines and growth factors are thought to induce expression of the COX-2 gene<sup>31,32</sup> and iNOS.<sup>33</sup> Therefore, it is possible that these mediators induce NO release mediated by iNOS, leading to up-regulation of the expression of COX-2. Therefore, it seems that the up-regulation of COX-2 is due to NO produced by both iNOS and nNOS and that the NO-induced PG production in inflammation is due to enhancement of the expression of COX-2 and probably due to activation of COX-2 in the late phase. Although it has been uncertain whether NO interacts directly or indirectly with COX-2, a recent study by Chun *et al.*<sup>34</sup> suggested that NO induces COX-2 up-regulation in mouse skin through an activation of

enkaryotic transcription factor NF- $\kappa$ B, which is a critical regulator of COX-2 expression.

The current study showed that the selective COX-1 inhibitor SC-560 inhibited the production of PGE<sub>2</sub> and PGI<sub>2</sub> in the early phase of carrageenan-induced inflammation, and the selective COX-2 inhibitor NS-398 inhibited the production in the late phase. In addition, neither COX-1 nor COX-2 expression was up-regulated in the early phase. These facts suggest that the activation of COX-1 contributes to production of PGs in the early phase. In contrast to COX-2, the up-regulation of COX-1 in the skin observed in the late phase was not mediated by NO, because L-NMMA did not suppress the up-regulation of COX-1 expression. It seems that the NO-independent up-regulation of COX-1 in the late phase does not contribute to the production of PGs, because the COX-1 inhibitor did not suppress the production of PGs in this phase. Furthermore, the expression was inhibited in the animals with denervation. These suggest that up-regulation of COX-1 in inflammation is independent on the action of NO but is mediated by the actions of other mediators derived from nerves. Although there are abundant data indicating that COX-2 is important in inflammation and pain, COX-1 has also been suggested to play a role in inflammatory processes.<sup>35</sup> Some studies have demonstrated that selective inhibition of COX-2 only partially reduced the concentrations of PGs at sites of inflammation in comparison with nonsteroidal antiinflammatory drugs, which reduced PGs to undetectable concentrations.<sup>36,37</sup> Therefore, COX-1 may contribute to the total pool of PG at a site of inflammation. Consistent with these results, activation and expression of both COX-1 and COX-2 contribute to the production of PGs, as shown in this study. Smith *et al.*<sup>38</sup> reported that either COX-1 or COX-2 inhibition prevented the increases in concentrations of PGs above basal concentrations in carrageenan-induced inflammation in the rat hind paw and that COX-2 but not COX-1 inhibition prevented the development of edema and hyperalgesia. A therapeutic dose of a COX-1 inhibitor did not reverse either hyperalgesia or edema but reduced the concentration of PGE<sub>2</sub> in the inflamed foot pad.<sup>38</sup> Therefore, it is possible that COX-1-derived PGs do not mediate inflammatory responses in a model of carrageenan-induced inflammation. This suggests that COX-2-derived PGs might be distinguishable from those synthesized by COX-1. Further study is needed to clarify the role of COX-1 in inflammation.

The current study demonstrated that although COX-1 and COX-2 exist in the DRG in normal state, up-regulation of expressions of these enzymes was not observed for up to 6 h after carrageenan injection. This indicates that the up-regulation of COX-1 and COX-2 expressions observed in the late phase occurs at peripheral sites other than peripheral nerves (fig. 7).

### Prostaglandins and NO Production

The effect of PGs on the NOS pathway has not been fully explored. In the current study, we demonstrated that neither a selective COX-1 inhibitor nor a selective COX-2 inhibitor, at the dose that effectively inhibited PGs production, inhibited the increasing in NO concentrations after carrageenan. This suggests that PGs do not modify the NOS pathway. Tetsuka *et al.*<sup>39</sup> reported that endogenously released PGE<sub>2</sub> down-regulates iNOS induction and exogenously administered PGI<sub>2</sub> up-regulates iNOS induction in rat mesangial cells. These opposite effects of PGE<sub>2</sub> and PGI<sub>2</sub> might offset each other to induction of NOS after inflammation.

In conclusion, subcutaneous carrageenan injection induces peripheral release of PGE<sub>2</sub> and PGI<sub>2</sub> due to activation of COX-1 in early phase of carrageenan-induced inflammation and up-regulation of COX-2 expressions in the late phase in the skin. The activation of COX-1 and the up-regulation of the expression of COX-2 are facilitated by NO. Therefore, NO may exacerbate the inflammatory process through the generation of additional PG production. In addition, an NOS inhibitor may have the advantage of alleviating inflammatory symptoms through dual inhibition of NO and NO-driven COX activation and expression.

The authors thank Hitoshi Sohma, Ph.D. (Associate Professor, Department of Biochemistry, Sapporo Medical University School of Medicine, Sapporo, Japan), for suggestions on Western blot analysis.

## References

- Robbins RA, Grisham MB: Nitric oxide. *Int Biochem Cell Biol* 1997; 29: 857-60
- Omote K, Kawamata T, Kawamata M, Nakayama Y, Hazama K, Namiki A: Activation of peripheral NMDA-nitric oxide cascade in formalin test. *ANESTHESIOLOGY* 2000; 93:173-8
- Omote K, Hazama K, Kawamata T, Kawamata M, Nakayama Y, Toriyabe M, Namiki A: Peripheral nitric oxide in carrageenan-induced inflammation. *Brain Res* 2001; 912:171-5
- Lawand NB, Willis WD, Westlund KN: Blockade of joint inflammation and secondary hyperalgesia by L-NAME, a nitric oxide synthase inhibitor. *Neuroreport* 1997; 8:895-9
- Salvemini D, Manning PT, Zweifel BS, Seibert K, Connor J, Currie MG, Needleman P, Masferrer JL: Dual inhibition of nitric oxide and prostaglandin production contributes to the antiinflammatory properties of nitric oxide synthase inhibitors. *J Clin Invest* 1995; 96:301-8
- Salvemini D, Wang ZQ, Wyatt PS, Bourdon DM, Marino MH, Manning PT, Currie MG: Nitric oxide: A key mediator in the early and late phase of carrageenan-induced rat paw inflammation. *Br J Pharmacol* 1996; 118:829-38
- Taiwo YO, Levine JD: Prostaglandin effects after elimination of indirect hyperalgesic mechanisms in the skin of the rat. *Brain Res* 1989; 492:397-9
- England S, Bevan S, Docherty RJ: PGE<sub>2</sub> modulates the tetrodotoxin-resistant sodium current in neonatal rat dorsal root ganglion neurons via the cyclic AMP-protein kinase A cascade. *J Physiol* 1996; 495:429-40
- Nakayama Y, Omote K, Namiki A: Role of prostaglandin receptor EP<sub>1</sub> in the spinal dorsal horn in carrageenan-induced inflammatory pain. *ANESTHESIOLOGY* 2002; 97:1254-62
- Bley KR, Hunter JC, Eglen RM, Smith JAM: The role of IP prostanoid receptors in inflammatory pain. *Trends Pharmacol Sci* 1998; 19:140-7
- O'Neill GP, Ford-Hutchinson AW: Expression of mRNA for cyclooxygenase-1 and cyclooxygenase-2 in human tissues. *FEBS Lett* 1993; 330:156-60
- Dubois RN, Abramson SB, Crofford L, Gupta RA, Simon LS, Van De Putte LBA, Lipsky PE: Cyclooxygenase in biology and disease. *FASEB J* 1998; 12: 1063-73
- Chen X, Levine JD: NOS inhibitor antagonism of PGE<sub>2</sub>-induced mechanical sensitization of cutaneous C-fiber nociceptors in the rat. *J Neurophysiol* 1999; 81:963-6
- Salvemini D, Misko TP, Masferrer JL, Seibert K, Currie MG, Needleman P: Nitric oxide activates cyclooxygenase enzymes. *Proc Natl Acad Sci U S A* 1993; 90:7240-4
- Amin AR, Attur M, Patel RN, Thakker GD, Marshall PJ, Rediske J, Stuchin SA, Patel IR, Abramson SB: Superinduction of cyclooxygenase-2 activity in human osteoarthritis-affected cartilage: Influence of nitric oxide. *J Clin Invest* 1997; 99:1231-7
- Habib A, Bernard C, Lebreton M, Creminon C, Esposito B, Tedgui A, MacLouf J: Regulation of the expression of cyclooxygenase-2 by nitric oxide in rat peritoneal macrophages. *J Immunol* 1997; 158:3845-51
- Goodwin DC, Landino LM, Marnett LJ: Effect of nitric oxide and nitric oxide-derived species on prostaglandin endoperoxide synthase and prostaglandin biosynthesis. *FASEB J* 1999; 13:1121-36
- Omote K, Kawamata T, Kawamata M, Namiki A: Formalin-induced release of excitatory amino acids in the skin of the rat hindpaw. *Brain Res* 1998; 787:161-4
- Kawamata T, Omote K: Activation of spinal N-methyl-D-aspartate receptors stimulates a nitric oxide/cyclic guanosine 3',5'-monophosphate/glutamate release cascade in nociceptive signaling. *ANESTHESIOLOGY* 1999; 91:1415-24
- Knowles RG, Moncada S: Nitric oxide synthases in mammals. *Biochem J* 1994; 298:249-58
- Moncada S, Gryglewski R, Bunting S, Vane JR: An enzyme isolated from arteries transforms prostaglandin endoperoxides to an unstable substance that inhibits platelet aggregation. *Nature* 1976; 263:663-5
- Taiwo YO, Levine JD: Characterization of the arachidonic acid metabolites mediating bradykinin and noradrenaline hyperalgesia. *Brain Res* 1988; 458:402-6
- Ferreira SH, Lorenzetti BB: Prostaglandin hyperalgesia: IV: A metabolic process. *Prostaglandins* 1981; 21:789-92
- Mizumura K, Sato J, Kumazawa T: Comparison of the effects of prostaglandins E<sub>2</sub> and I<sub>2</sub> on testicular nociceptor activities studied in vitro. *Naunyn-Schmiedeberg Arch Pharmacol* 1991; 344:368-76
- Pitchford S, Levine JD: Prostaglandins sensitize nociceptors in cell culture. *Neurosci Lett* 1991; 132:105-8
- Gryglewski RJ, Palmer RM, Moncada S: Superoxide anion is involved in the breakdown of endothelium-derived vascular relaxing factor. *Nature* 1986; 320: 454-6
- Egan RW, Paxton J, Kuehl FA Jr: Mechanism for irreversible self-deactivation of prostaglandin synthetase. *J Biol Chem* 1976; 251:7329-35
- Hajjar DP, Lander HM, Pearce SFA, Upmacis RK, Pomerantz KB: Nitric oxide enhances prostaglandin-H synthase-1 activity by a heme-independent mechanism: Evidence implicating nitrosothiols. *J Am Chem Soc* 1995; 117: 3340-6
- Landino LM, Crews BC, Timmons MD, Morrow JD, Marnett LJ: Peroxynitrite, the coupling product of nitric oxide and superoxide, activates prostaglandin biosynthesis. *Proc Natl Acad Sci U S A* 1996; 93:15069-74
- Posadas I, Terencio MC, Guillen I, Ferrandiz ML, Coloma J, Paya M, Alcaraz MJ: Co-regulation between cyclo-oxygenase-2 and inducible nitric oxide synthase expression in the time-course of murine inflammation. *Naunyn-Schmiedeberg Arch Pharmacol* 2000; 361:98-106
- Jones DA, Carlton DP, McIntyre TM, Zimmerman GA, Prescott SM: Molecular cloning of human prostaglandin endoperoxide synthase type II and demonstration of expression in response to cytokines. *J Biol Chem* 1993; 268:9049-54
- Hempel SL, Monick MM, Hunninghake GW: Lipopolysaccharide induces prostaglandin H synthase-2 protein and mRNA in human alveolar macrophages and blood monocytes. *J Clin Invest* 1994; 93:391-6
- Moncada S, Palmer RM, Higgs EA: Nitric oxide: Physiology, pathophysiology, and pharmacology. *Pharmacol Rev* 1991; 43:109-42
- Chun KS, Cha HH, Shin JW, Na HK, Park KK, Chung WY, Surh YJ: Nitric oxide induces expression of cyclooxygenase-2 in mouse skin through activation of NF- $\kappa$ B. *Carcinogenesis* 2004; 25:445-54
- Langenbach R, Morham SG, Taino HF, Loftin CD, Ghanayem BI, Chulada PC, Mahler JF, Lee CA, Goulding EH, Kluckman KD, Kim HS, Smithies O: Prostaglandin synthase 1 gene disruption in mice reduces arachidonic acid-induced inflammation and indomethacin-induced gastric ulceration. *Cell* 1995; 83:483-92
- Seibert K, Zhang Y, Leahy K, Hauser S, Masferrer J, Perkins W, Lee L, Isakson P: Pharmacological and biochemical demonstration of the role of cyclooxygenase 2 in inflammation and pain. *Proc Natl Acad Sci U S A* 1994; 91: 12013-7
- Anderson GD, Hauser SD, McGarity KL, Bremer ME, Isakson PC, Gregory SA: Selective inhibition of cyclooxygenase (COX)-2 reverses inflammation and expression of COX-2 and interleukin 6 in rat adjuvant arthritis. *J Clin Invest* 1996; 97:2672-9
- Smith CJ, Zhang Y, Koboldt CM, Muhammad J, Zweifel BS, Shaffer A, Talley JJ, Masferrer JL, Seibert K, Isakson PC: Pharmacological analysis of cyclooxygenase-1 in inflammation. *Proc Natl Acad Sci U S A* 1998; 95:13313-8
- Tetsuka T, Daphna-Iken D, Srivastava SK, Baier LD, DuMaine J, Morrison AR: Cross-talk between cyclooxygenase and nitric oxide pathways: Prostaglandin E<sub>2</sub> negatively modulates induction of nitric oxide synthase by interleukin 1. *Proc Natl Acad Sci U S A* 1994; 91:12168-72
